# Supplementary material for: The Patient-Oriented Four Habits Model (POFHM) to Enhance Doctor–Patient Relationships in Community Health Care: A Stepped Wedge Cluster Randomized Trial
Source: Research Square preprint supplement (doi:10.21203/rs.3.rs-8312108/v1), 2026-01-13
Supplement: Supplementary file 2 [file 8cdd663b1e70e6bee9f69d2d.docx]

| **Supplementary Table 1 | Primary Outcomes by Time Point and Wedge（N=1866）** | | | | |
| --- | --- | --- | --- | --- |
|  | β coefficient (95% CI) | | | |
|  | **Control (N=463)** | **Patient INT (N=440)** | **Doctor INT (N=420)** | **Both INT (N=543)** |
| **Literacy of Patient** |  |  |  |  |
| Scores (Means±SD) | 4·18 ± 0·49 | 4·28 ± 0·53 | 4·14 ± 0·52 | 4·26 ± 0·46 |
| Model 1 | reference | 0·06 (-0·010, 0·130) | 0·01 (-0·060, 0·080) | **0·11 (0·050, 0·180)** |
| Model 2 | reference | **0·13 (0·040, 0·230)** | -0·04 (-0·140, 0·070) | **0·22 (0·090, 0·350)** |
| Model 3 | reference | **0·15 (0·050, 0·240)** | -0·02 (-0·130, 0·090) | **0·24 (0·110, 0·370)** |
| Model 4a | reference | **0·15 (0·060, 0·250)** | -0·06 (-0·170, 0·050) | **0·23 (0·100, 0·360)** |
| **Sense of Control** |  |  |  |  |
| Scores (Means±SD) | 3·46 ± 0·87 | 3·47 ± 0·95 | 3·53 ± 0·83 | 3·66 ± 0·83 |
| Model 1 | reference | 0·05 (-0·070, 0·170) | 0·09 (-0·030, 0·220) | **0·16 (0·050, 0·270)** |
| Model 2 | reference | 0·08 (-0·070, 0·240) | 0·09 (-0·090, 0·270) | **0·25 (0·040, 0·450)** |
| Model 3 | reference | 0·12 (-0·020, 0·260) | 0·11 (-0·070, 0·280) | **0·27 (0·100, 0·450)** |
| Model 4b | reference | 0·12 (-0·020, 0·260) | 0·12 (-0·050, 0·290) | **0·29 (0·120, 0·460)** |
| **Doctor-patient Communication** | |  |  |  |
| Scores (Means±SD) | 4·42 ± 0·57 | 4·51 ± 0·57 | 4·23 ± 0·71 | 4·39 ± 0·60 |
| Model 1 | reference | -0·02 (-0·100, 0·070) | -0·06 (-0·140, 0·030) | 0·03 (-0·050, 0·100) |
| Model 2 | reference | 0·03 (-0·110, 0·170) | -0·05 (-0·190, 0·090) | 0·10 (-0·110, 0·300) |
| Model 3 | reference | 0·04 (-0·100, 0·170) | -0·04 (-0·190, 0·100) | 0·11 (-0·090, 0·310) |
| Model 4c | reference | 0·05 (-0·060, 0·170) | -0·02 (-0·150, 0·110) | 0·13 (-0·030, 0·290) |

Model 1: Unadjusted

Model 2: Adjusted for region and time (fixed-effet, regarded as ordinal categorical variable (reference: T1))

Model 3: Additionally adjusted for gender and age

Model 4a: Additionally adjusted for education, personal month cost, and visit time

Model 4b: Additionally adjusted for insurance status, health status, family doctor contract status and familiarity with the doctor

Model 4c: Additionally adjusted for relatives in healthcare, familiarity with the doctor and visit time

**Supplementary Figure 1** | Subgroup Analysis of Intervention Effects Across Different Regions


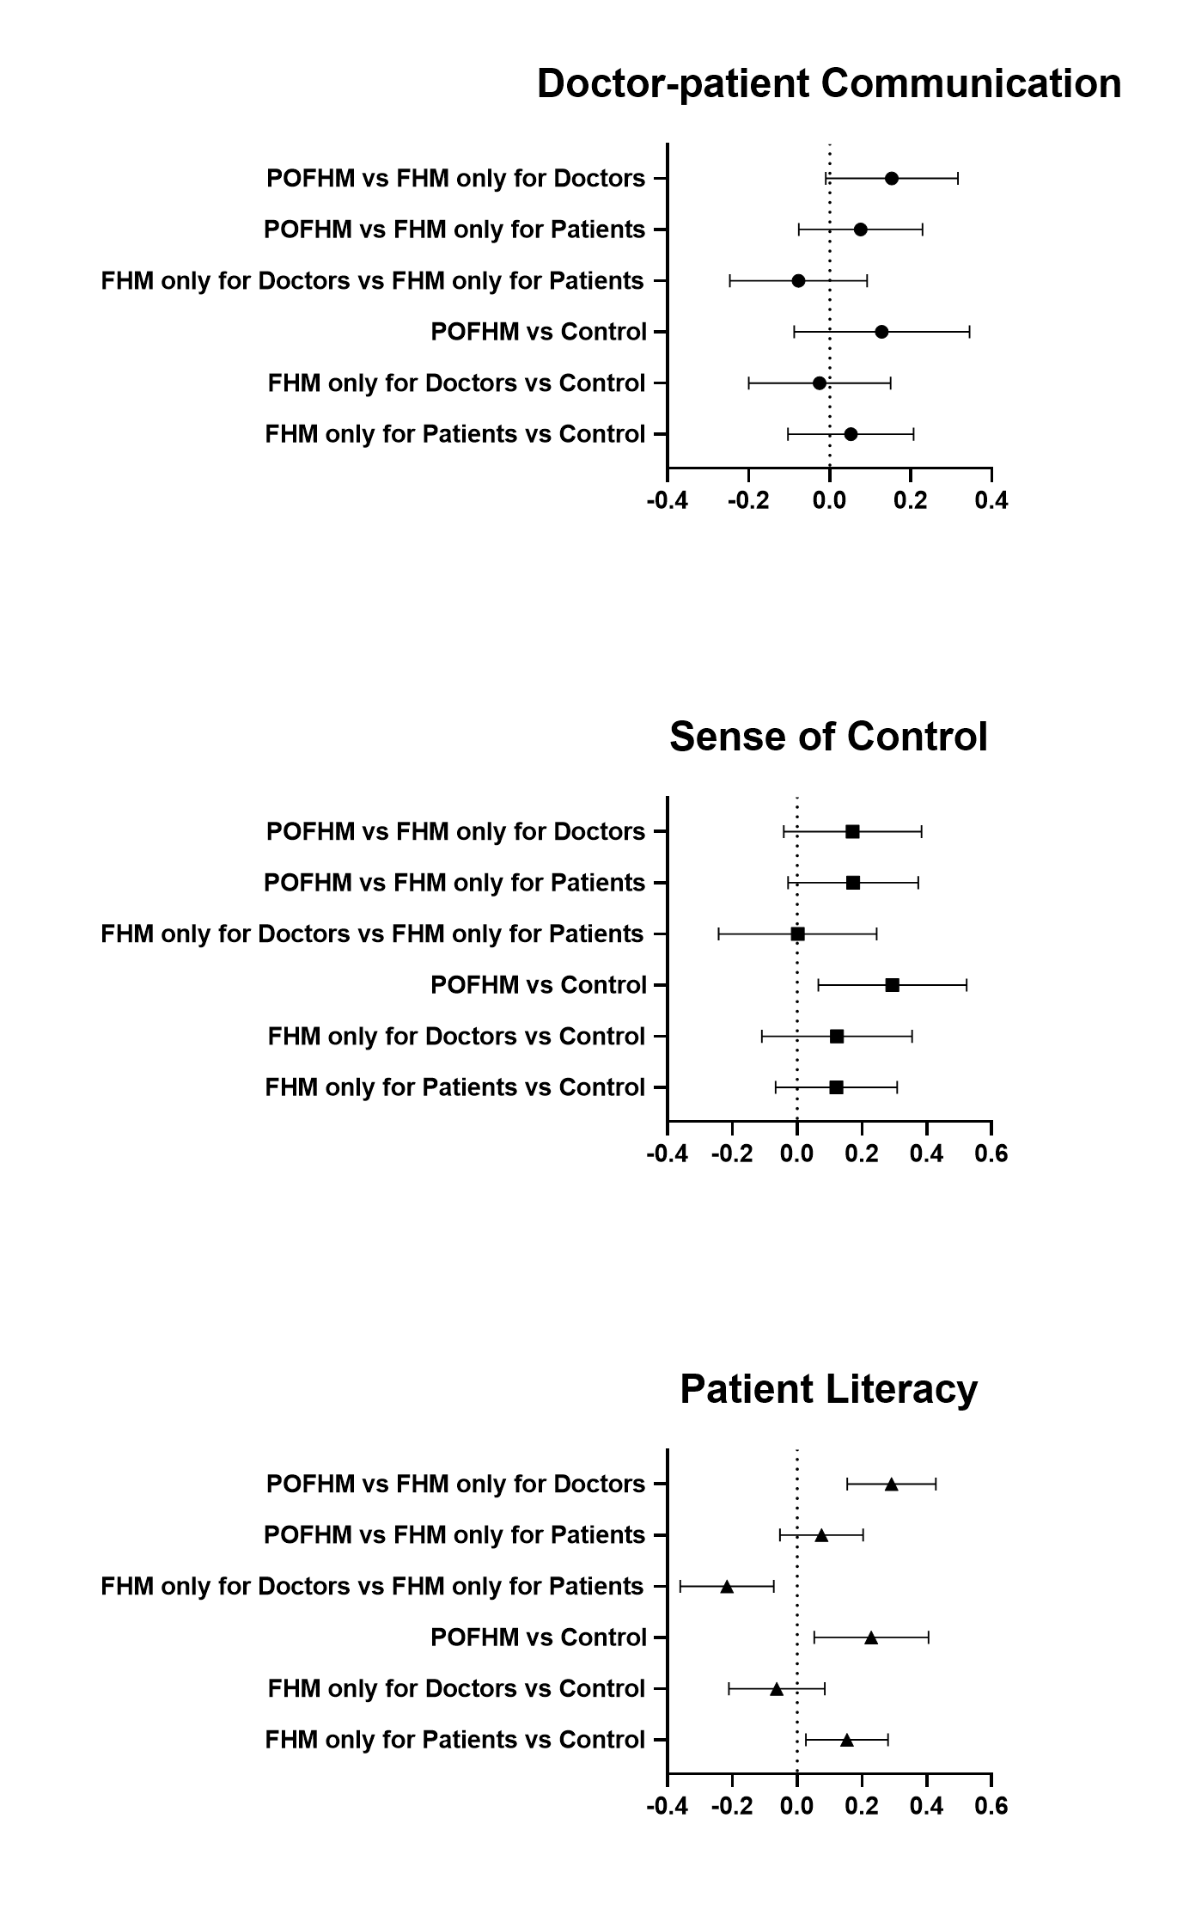


### **Manipulation Check**

*Please recall your outpatient visit and indicate, based on your actual experience, whether each statement applies to you by selecting “Yes” or “No.”*
Did you take responsibility for your own health?

Did you communicate with your doctor about your most important concerns?

Were you aware of your own emotions and those of your doctor?

Did you summarize or restate the key points of the medical advice?

Did the doctor approve of your responsible behavior?

Did the doctor give you the opportunity to express your problem?

Did your doctor take care of your emotions?

Did your doctor remind you to repeat or summarize the key points of your medical advice
